# Supplementary material for: Characterization of Three Variants of SARS-CoV-2 In Vivo Shows Host-Dependent Pathogenicity in Hamsters, While Not in K18-hACE2 Mice
Source: MDPI journal article supplement (doi:10.3390/v14112584), 2022-11-21
Supplement: s1 [file s1]

[A]

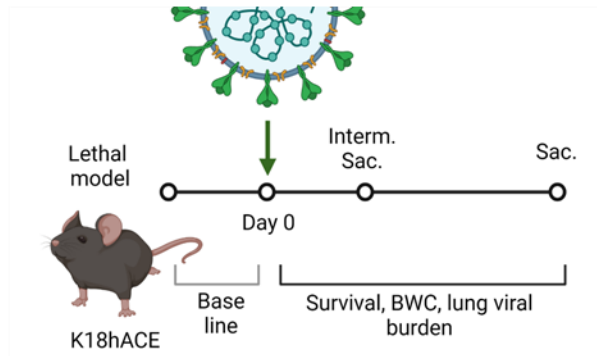

[B]

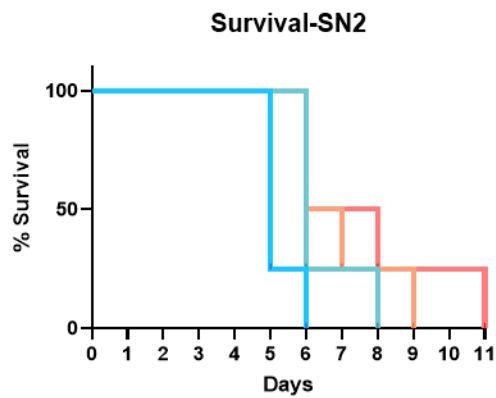

[C]

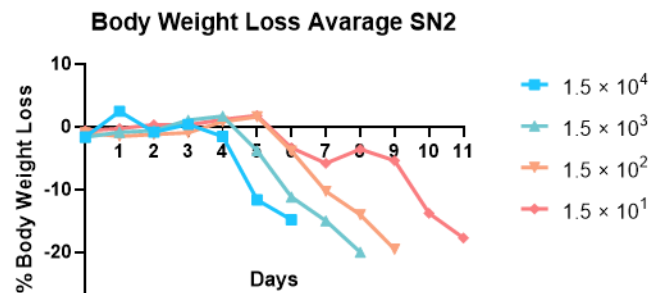

**Supplemental Figure S1.** Survival in K18-human angiotensin-converting enzyme 2 (hACE2) transgenic mice. (A) Experimental Design in mice (n = 6) infected intranasally with four (4) 10-fold serial dilutions of B.1.617.2/Delta SARS-CoV-2. Survival (B) and Body weight Loss (C) were monitored daily for 11 dpi.

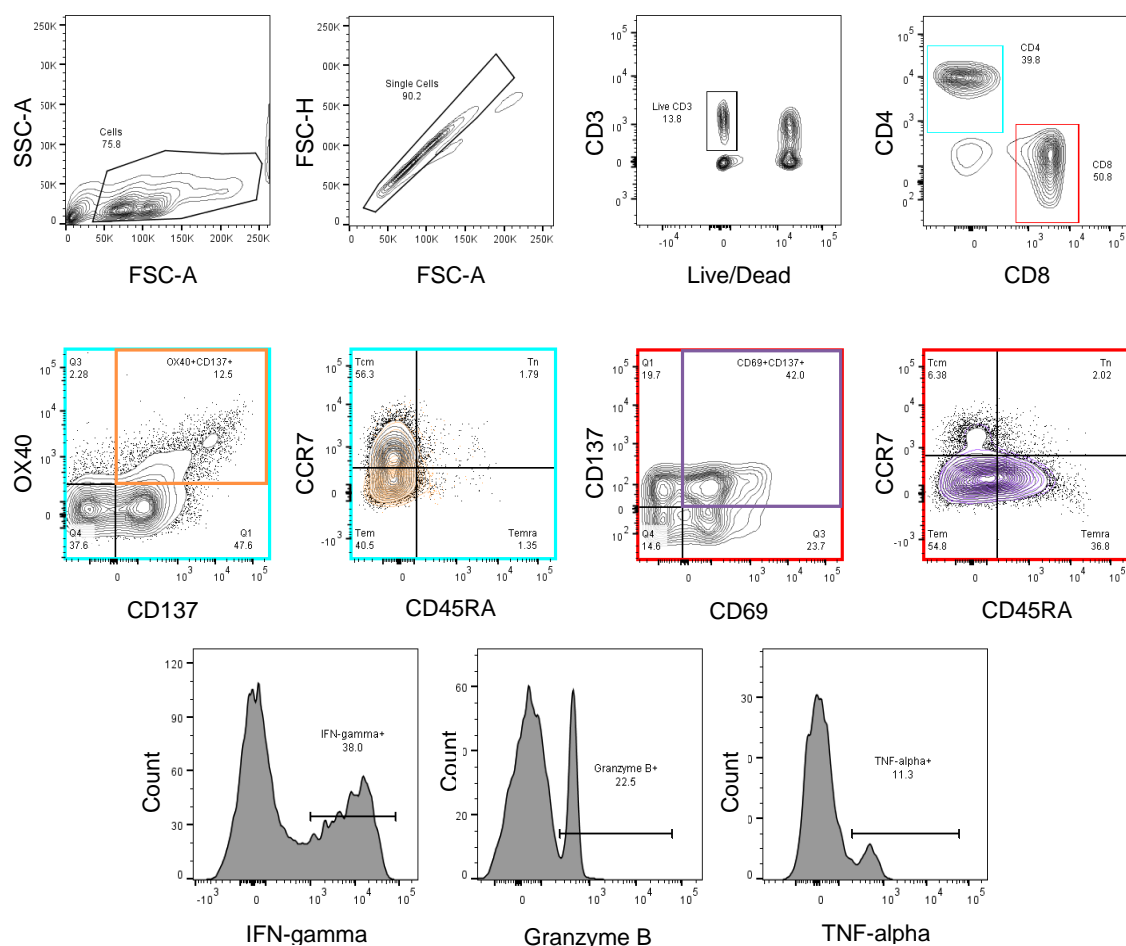

**Supplemental Figure S2.** Flow Cytometry Gating Strategy for AIM assay, memory phenotyping, and cytokine production. Representative graphs illustrating gating strategy used in flow cytometry-based assays to define antigen-specific CD4<sup>+</sup> (outlined in blue) and CD8<sup>+</sup> (outlined in red) T cells by the expression of OX40<sup>+</sup>CD137<sup>+</sup> and CD69<sup>+</sup>CD137<sup>+</sup>, respectively. The memory compartment was analyzed by gating naïve (Tn; CD45RA<sup>+</sup>CCR7<sup>+</sup>), central memory (Tcm; CD45RA<sup>+</sup>CCR7<sup>+</sup>), effector memory (Tem; CD45RA<sup>+</sup>CCR7<sup>-</sup>), and terminally differentiated effector memory (Temra; CD45RA<sup>+</sup>CCR7<sup>-</sup>) cells on bulk CD4<sup>+</sup> and CD8<sup>+</sup> T cells as well as AIM<sup>+</sup> subsets, overlaid in orange and purple, respectively. Cytokine production was analyzed from both CD4<sup>+</sup>AIM<sup>+</sup> and CD8<sup>+</sup>AIM<sup>+</sup> T cells.
